# Supplementary material for: Transgenic human C-reactive protein affects oxidative stress but not inflammation biomarkers in the aorta of spontaneously hypertensive rats
Source: PubMed Central journal article supplement (PMC11020172; doi:10.1186/s12872-024-03870-7), 2024-04-16

**GAPDH**

Molecular weight: 37kDa

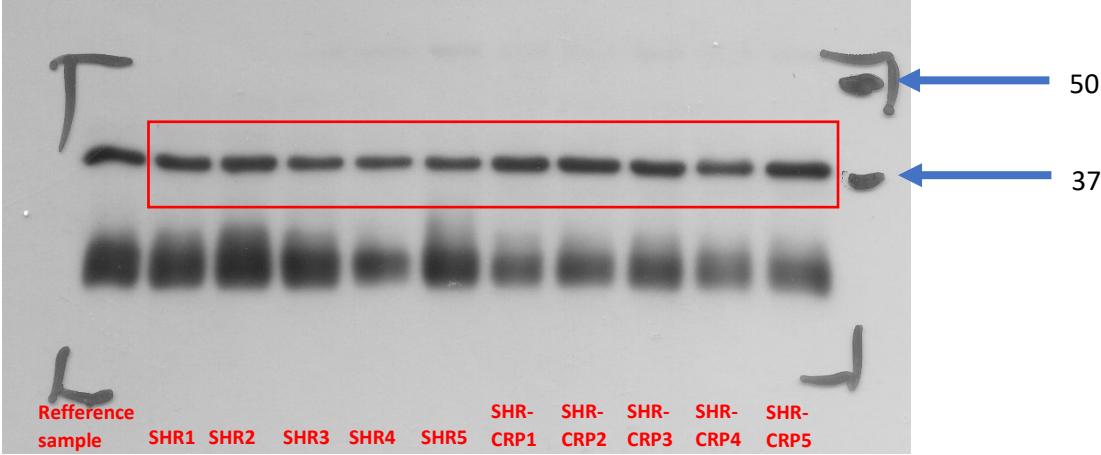

**eNOS**

Molecular weight: approximately 140kDa

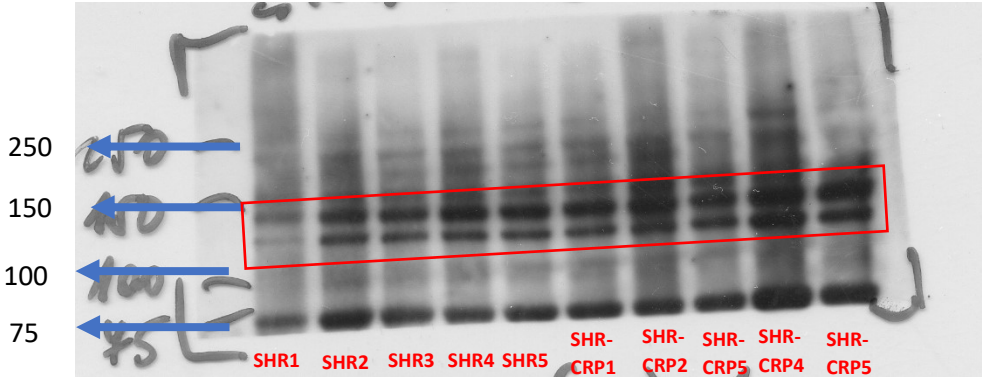

**p-eNOS**

Molecular weight: approximately 140kDa

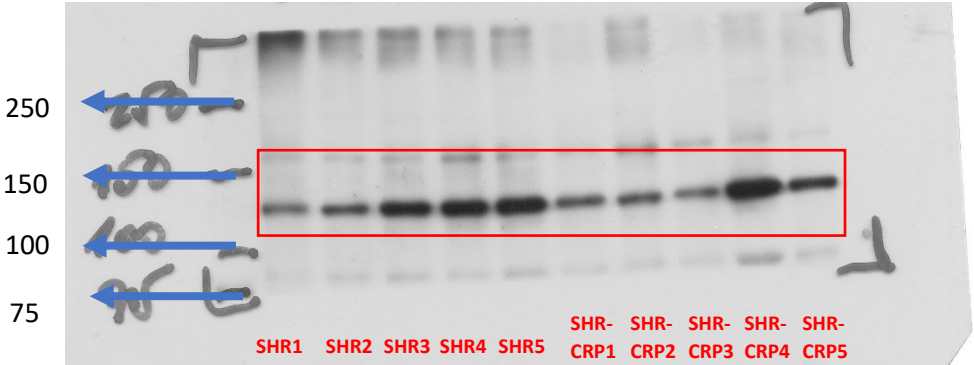

**ENG**

Molecular weight: approximately 95kDa

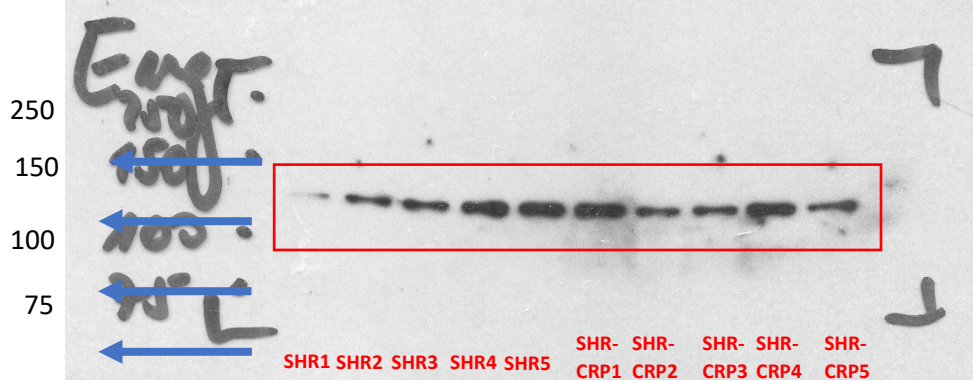

**p-NFkB**

Molecular weight: approximately 70kDa

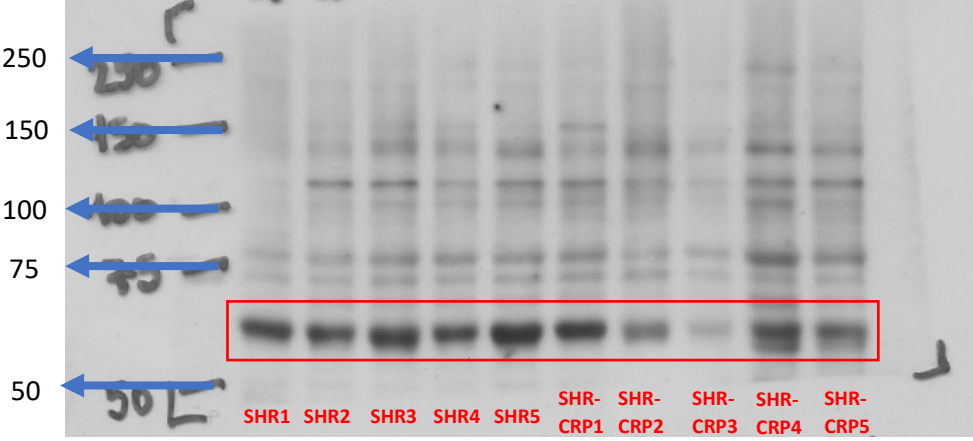

**P-selectin**

Molecular weight: approximately 91kDa

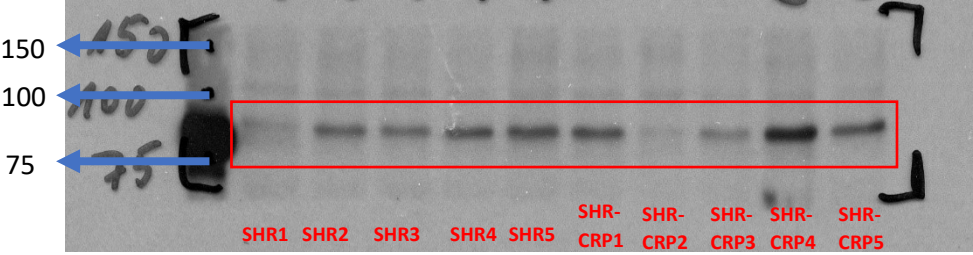

**COX2**

Molecular weight: approximately 70kDa

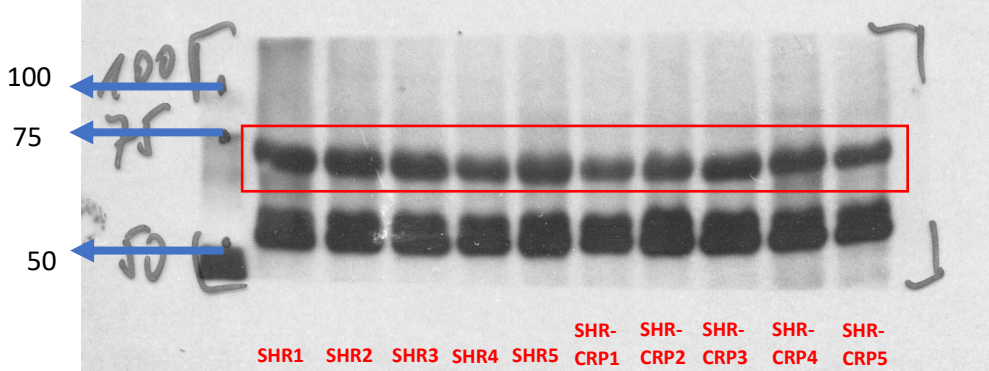

**HO-1**

Molecular weight: approximately 33kDa

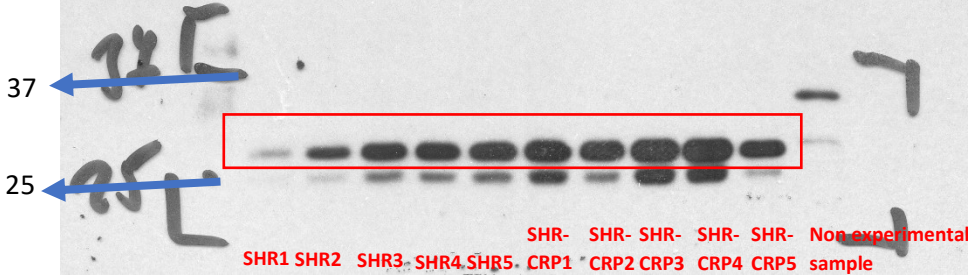

**SOD3**

Molecular weight: approximately 30kDa

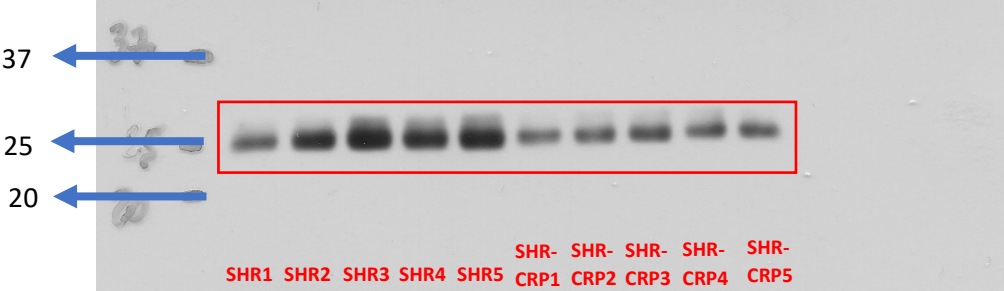

Supplement: 12872_2024_3870_MOESM1_ESM.pdf [file 12872_2024_3870_MOESM1_ESM.pdf]
